# Supplementary material for: The Need for Randomization in Animal Trials: An Overview of Systematic Reviews
Source: PLoS One. 2014 Jun 6;9(6):e98856. doi: 10.1371/journal.pone.0098856 (PMC4048216; doi:10.1371/journal.pone.0098856)
Supplement: Appendix S1 — Search Strategy. (DOCX) [file pone.0098856.s001.docx]

**Appendix 1. Search Strategy**

**MEDLINE** (OvidSP) [1948 – present]

| | 1 | exp animals/ | 15915049 | | --- | --- | --- | | 2 | Disease Models, Animal/ | 186091 | | 3 | animal*.ti. | 84860 | | 4 | (animal studies or animal experiment?).ab. | 24928 | | 5 | 1 or 2 or 3 or 4 | 15928641 | | 6 | limit 5 to "reviews (maximizes specificity)" | 74588 | | 7 | meta analysis.pt. | 33031 | | 8 | meta-analysis as topic/ | 12022 | | 9 | (systematic review or metaanalysis or meta-analysis).ti,ab. | 57101 | | 10 | (medline or pubmed or embase or biosis or "web of knowledge" or "web of science" or "science citation index").ab. | 56448 | | 11 | 7 or 8 or 9 or 10 | 107918 | | 12 | 5 and 11 | 96120 | | 13 | Publication Bias/ | 1816 | | 14 | Research Design/ | 65719 | | 15 | Random Allocation/ | 73877 | | 16 | double-blind method/ or single-blind method/ | 129406 | | 17 | therapy.fs. | 1287748 | | 18 | drug therapy.fs. | 1521978 | | 19 | Treatment Outcome/ | 516895 | | 20 | allocat*.ab. | 54822 | | 21 | conceal*.ab. | 6109 | | 22 | study design*.ab. | 97355 | | 23 | quality.ab. | 404684 | | 24 | blind*.ab. | 168874 | | 25 | (bias or unbias* or un-bias*).ab. | 68229 | | 26 | efficacy.ab. | 371164 | | 27 | intervention?.ab. | 396739 | | 28 | (full adj5 abstract?).ab. | 773 | | 29 | (heterogeneity or heterogeneous).ab. | 148315 | | 30 | Data Interpretation, Statistical/ | 41830 | | 31 | "Reproducibility of Results"/ | 228477 | | 32 | 13 or 14 or 15 or 16 or 17 or 18 or 19 or 20 or 21 or 22 or 23 or 24 or 25 or 26 or 27 or 28 or 29 or 30 or 31 | 4267171 | | 33 | 6 and 32 | 53993 | | 34 | 12 and 32 | 67617 | | 35 | human/ | 12214445 | | 36 | 33 not 35 | 311 | |  |  |  | |
| --- | --- | --- | --- | --- | --- | --- | --- | --- | --- | --- | --- | --- | --- | --- | --- | --- | --- | --- | --- | --- | --- | --- | --- | --- | --- | --- | --- | --- | --- | --- | --- | --- | --- | --- | --- | --- | --- | --- | --- | --- | --- | --- | --- | --- | --- | --- | --- | --- | --- | --- | --- | --- | --- | --- | --- | --- | --- | --- | --- | --- | --- | --- | --- | --- | --- | --- | --- | --- | --- | --- | --- | --- | --- | --- | --- | --- | --- | --- | --- | --- | --- | --- | --- | --- | --- | --- | --- | --- | --- | --- | --- | --- | --- | --- | --- | --- | --- | --- | --- | --- | --- | --- | --- | --- | --- | --- | --- | --- | --- | --- | --- |

**Embase** (OvidSP) [1974 – present]

Top of Form

| | 1 | animal model/ | 633958 | | --- | --- | --- | | 2 | animal experiment/ | 1607367 | | 3 | (nonhuman/ or animal*.ti.) and disease model/ | 22479 | | 4 | animal*.ti. | 96334 | | 5 | (animal studies or animal experiment?).ti,ab. | 37034 | | 6 | 1 or 2 or 3 or 4 or 5 | 1826626 | | 7 | limit 6 to "reviews (maximizes specificity)" | 767 | | 8 | allocat*.ab. | 66424 | | 9 | conceal*.ab. | 7670 | | 10 | study design*.ab. | 112606 | | 11 | quality.ab. | 531150 | | 12 | blind*.ab. | 214727 | | 13 | (bias or unbias* or un-bias*).ab. | 78351 | | 14 | efficacy.ab. | 486204 | | 15 | intervention?.ab. | 501009 | | 16 | (full adj5 abstract?).ab. | 886 | | 17 | (heterogeneity or heterogeneous).ab. | 174730 | | 18 | treatment outcome/ | 582189 | | 19 | outcome assessment/ | 158884 | | 20 | randomization/ | 57860 | | 21 | 8 or 9 or 10 or 11 or 12 or 13 or 14 or 15 or 16 or 17 or 18 or 19 or 20 | 2461736 | | 22 | 7 and 21 | 372 | |  |
| --- | --- | --- | --- | --- | --- | --- | --- | --- | --- | --- | --- | --- | --- | --- | --- | --- | --- | --- | --- | --- | --- | --- | --- | --- | --- | --- | --- | --- | --- | --- | --- | --- | --- | --- | --- | --- | --- | --- | --- | --- | --- | --- | --- | --- | --- | --- | --- | --- | --- | --- | --- | --- | --- | --- | --- | --- | --- | --- | --- | --- | --- | --- | --- | --- | --- | --- | --- |
